# Supplementary material for: Green Synthesis of Smart Metal/Polymer Nanocomposite Particles and Their Tuneable Catalytic Activities
Source: PubMed Central journal article supplement (PMC6432224; doi:10.3390/polym8040105), 2016-03-23

# Supplementary Materials: Green Synthesis of Smart Metal/Polymer Nanocomposite Particles and Their Tuneable Catalytic Activities

Noel Peter Bengzon Tan, Cheng Hao Lee and Pei Li

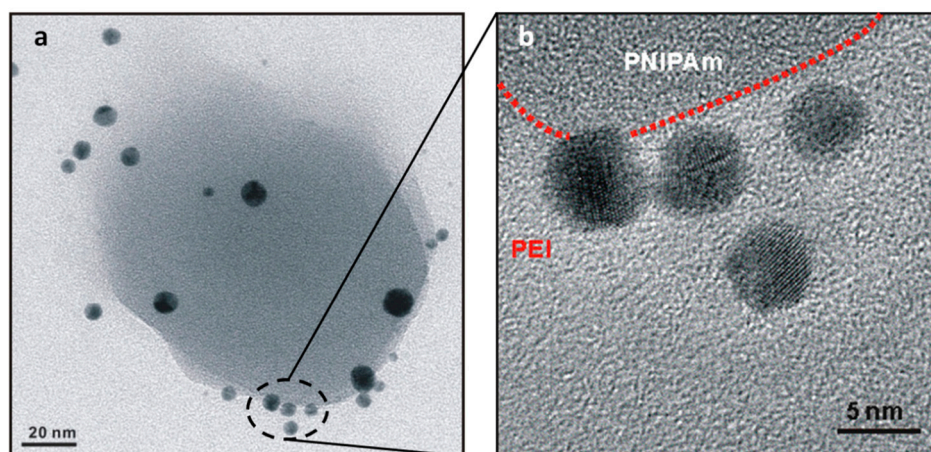

**Figure S1.** (a) TEM images of (a) Single PNIPAm/PEI particle template containing Ag@Au bimetallic nanoparticles; (b) The Ag@Au bimetallic nanoparticles observed under higher magnification.

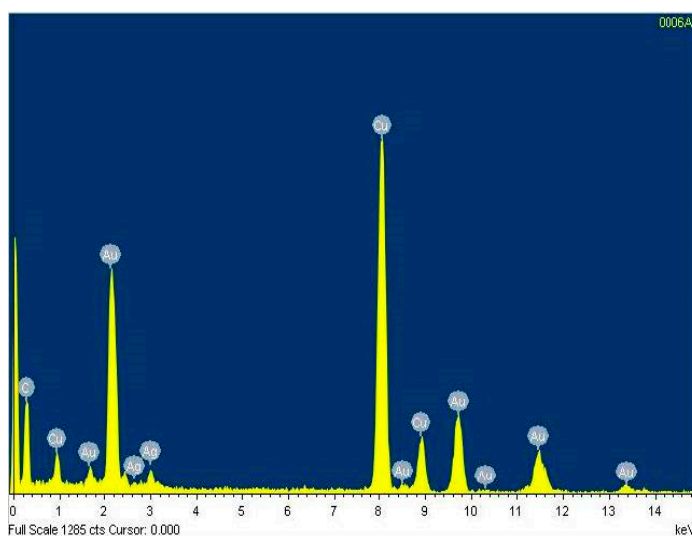

| Element | Weight % | Atomic % |
|---------|----------|----------|
| C K     | 13.25    | 69.75    |
| Ag L    | 9.09     | 5.33     |
| Au M    | 77.66    | 24.93    |

**Figure S2.** Elemental analysis of bimetallic nanoparticles indicates that the Ag and Au atomic% was 17.6 and 82.4, respectively.

## 1. Elemental XPS Spectra of Au and Au@Ag in PNIPAm/PEI

Elemental XPS peaks are shown in Figures S3 and S4 of both Au and Ag@Au in microgel template. C 1s peaks at 285.0 and 287.7 eV are assigned to C–C/C–H and C=O bonds. N1s peaks at 399.6 and 401.1 eV are assigned to the nitrogen from amine and amide. O 1s peaks at 531.6 and 533.3 eV are assigned to the amide and hydroxyl (O–H) functional groups.

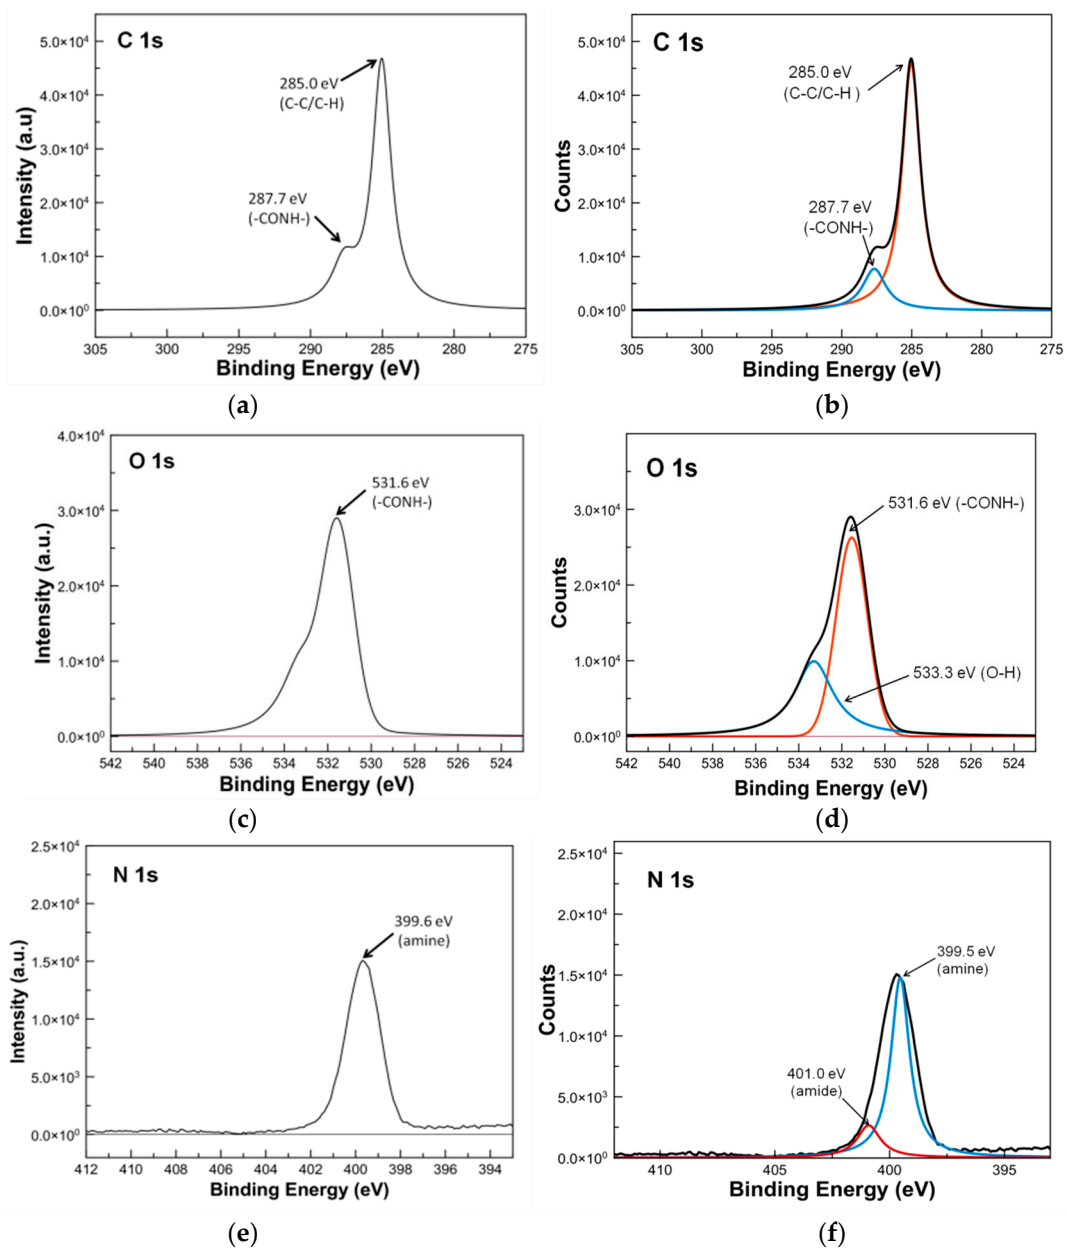

Figure S3. XPS spectra of C 1s (a,b), O 1s (c,d) and N 1s (e,f) peaks and corresponding deconvoluted peaks of the Au@PNIPAm/PEI.

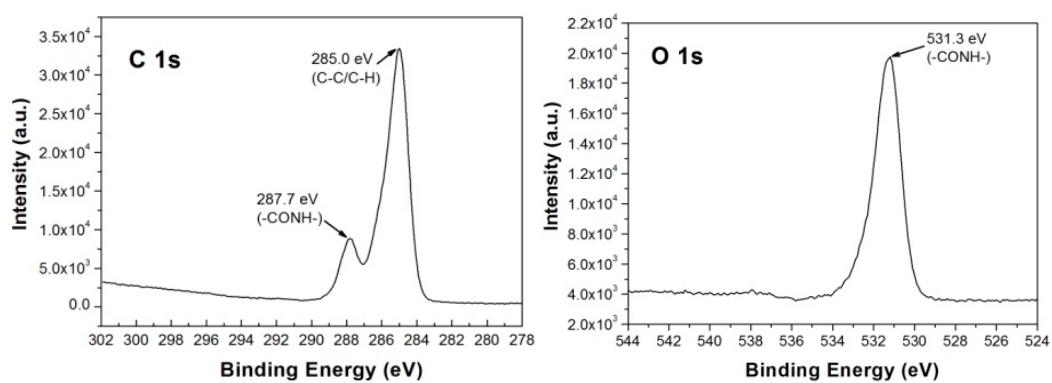

Figure S4. Cont.

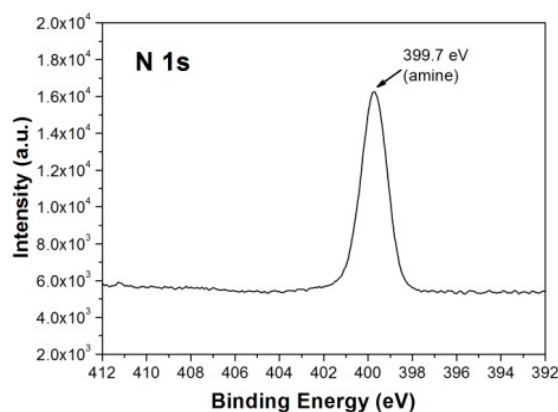

Figure S4. Deconvoluted XPS spectra of C 1s, N 1s and O 1s peaks of the Ag@Au/PNIPAm/PEI.

## 2. UV-vis Spectroscopy and Plot of $\ln(C_t/C_0)$ as a Function of Time of Control Experiment for the Reduction of *p*-Nitrophenol to *p*-Aminophenol

The reaction model, reduction of *p*-nitrophenol to *p*-aminophenol with sodium borohydride solution was used to demonstrate the catalytic reaction of the bimetallic nanoparticles. A control experiment was conducted by not using any catalyst for the said reaction. This was performed to compare the rate of reactions using the mono and bimetallic nanoparticles. Using a first order reaction, the slope of plotting  $\ln(C_t/C_0)$  with time gives the constant for the rate of reaction. Without the use of any catalyst, the constant for the rate of reaction was determined as  $5.4 \times 10^{-3}$ .

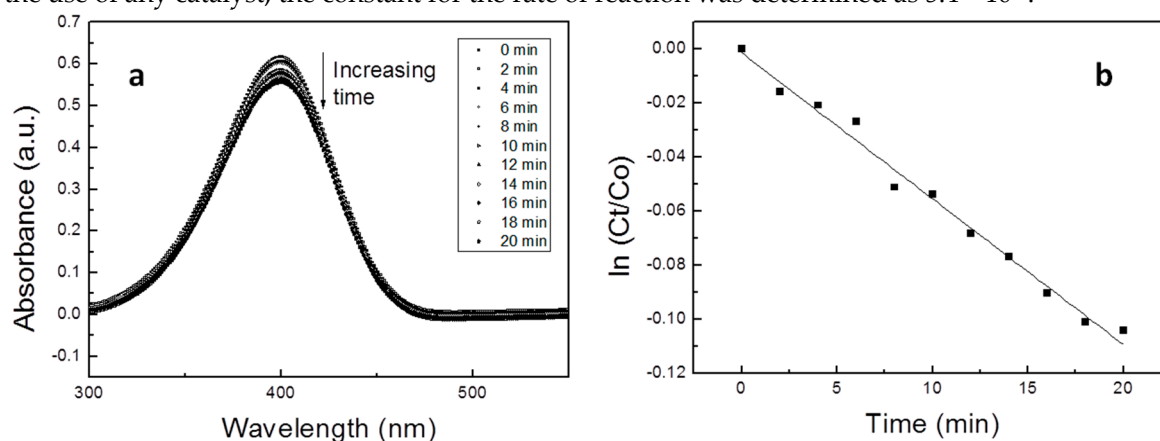

Figure S5. (a) UV-vis spectra of the sodium borohydride reduction of *p*-nitrophenol to *p*-aminophenol in the absence of a catalyst; (b) Plot of  $\ln(C_t/C_0)$  as a function of time of control experiment for the reduction of *p*-nitrophenol to *p*-aminophenol.

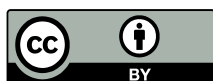

Supplement: polymers-08-00105-s001.pdf [file polymers-08-00105-s001.pdf]
